# Supplementary material for: Synthesis of sub-nanometric Cu2O catalysts for Pd-free C–C coupling reactions
Source: Royal Society of Chemistry journal article supplement (doi:10.1039/d1re00054c), 2021-01-01
Supplement: d1re00054c1.pdf [file d1re00054c1.pdf]

## Electronic Supplementary Information

### Sub-nanometric synthesis of Cu<sub>2</sub>O catalyst for Pd-free C-C coupling reactions

Ankit Agrawal,<sup>a,b,†</sup> Reena Goyal,<sup>c,†</sup> B. Moses Abraham,<sup>d</sup> Omvir Singh,<sup>a,b</sup> Mukesh K Poddar,<sup>e</sup> Shailendra Tripathi,<sup>a</sup> Rajaram Bal,<sup>\*e</sup> and Bipul Sarkar,<sup>\*a,b</sup>

<sup>a</sup> Catalytic De-Polymerization Area, Upstream & Wax Rheology Division, CSIR-Indian Institute of Petroleum, Dehradun 248005, India

E-mail: [bsarkar@iip.res.in](mailto:bsarkar@iip.res.in)

<sup>b</sup> Academy of Scientific and Innovative Research (AcSIR), CSIR-HRDC Campus, Sector 19, Kamla Nehru Nagar, Ghaziabad, Uttar Pradesh 201002, India

<sup>c</sup> Department of Chemical Engineering, Indian Institute of Technology-Roorkee, Roorkee-247667, Uttarakhand, India

<sup>d</sup> Advanced Centre of Research in High Energy Materials (ACRHEM), University of Hyderabad, Prof. C. R. Rao Road, Gachibowli, Telangana, Hyderabad 500046, India

<sup>e</sup> Nano Catalysis Area, Catalytic Conversion and Process Division, CSIR-Indian Institute of Petroleum, Dehradun 248005, India

E-mail: [raja@iip.res.in](mailto:raja@iip.res.in)

† Both authors contribute equally.

Figure S1

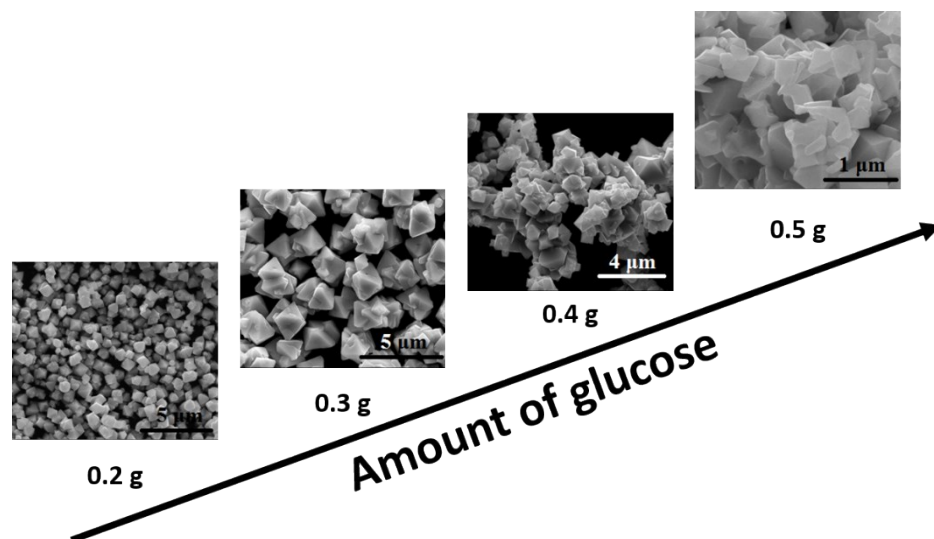

**Figure S1.** Effect of glucose on the shape-selective synthesis of  $\text{Cu}_2\text{O}$  nanostructures.

Figure S2

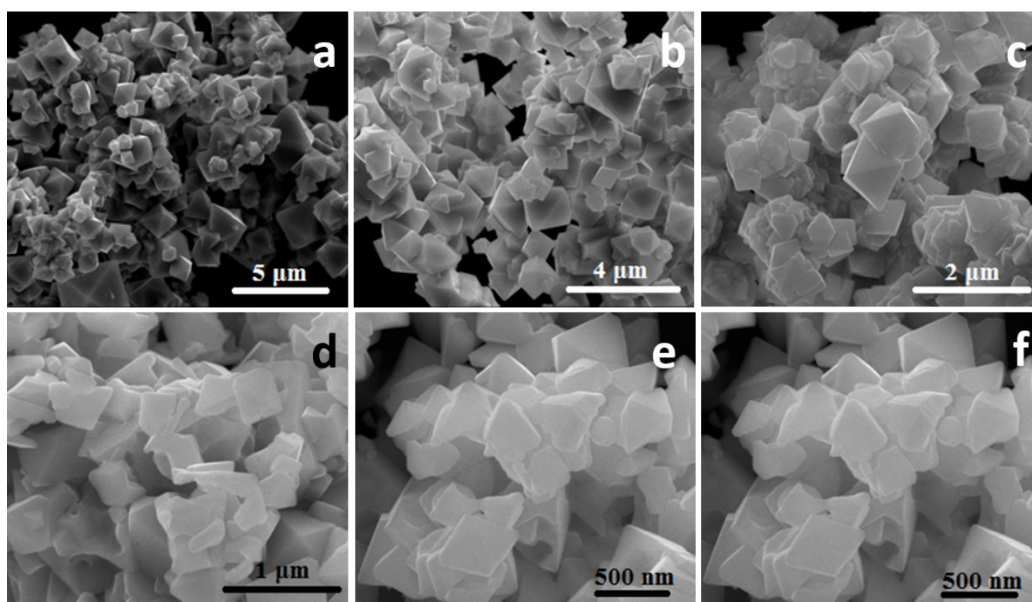

**Figure S2.** SEM micrographs of  $\text{Cu}_2\text{O}$  nanocrystals: (a-c) synthesised in the absence of NaOH solution and (d-f) with 5, 10 and 20 nmol NaOH solution.

Figure S3.

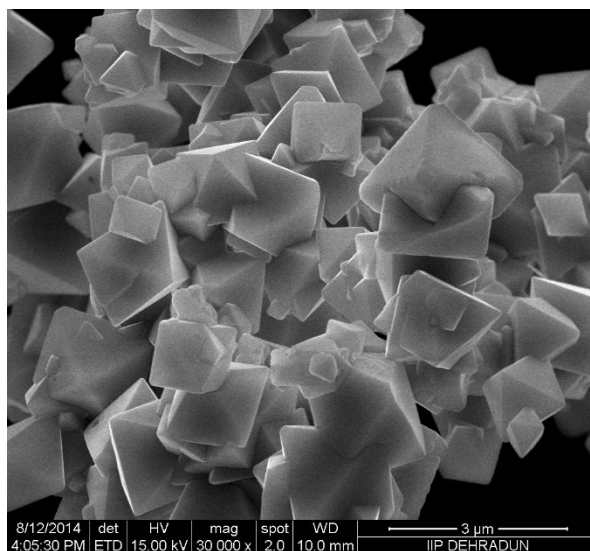

**Figure S3.** Morphology obtained during high temperature (90°C) sonicated sample.

Figure S4.

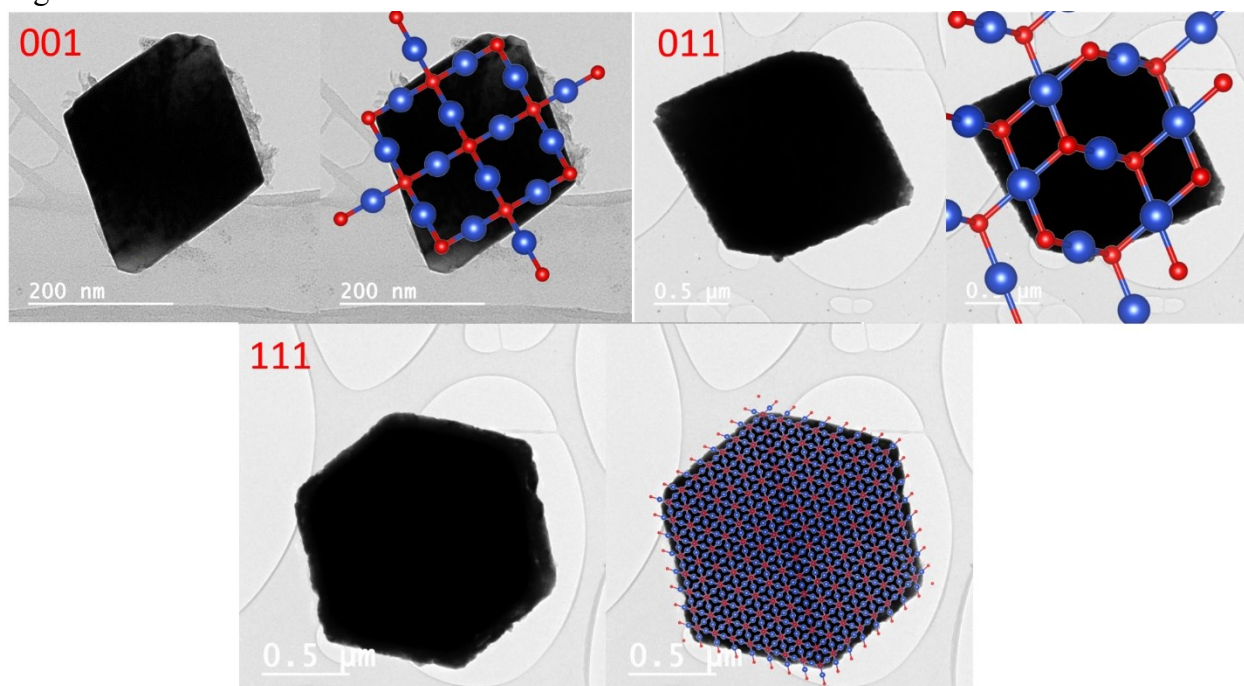

**Figure S4.** TEM images of the well-defined Cu<sub>2</sub>O facets.

Figure S5.

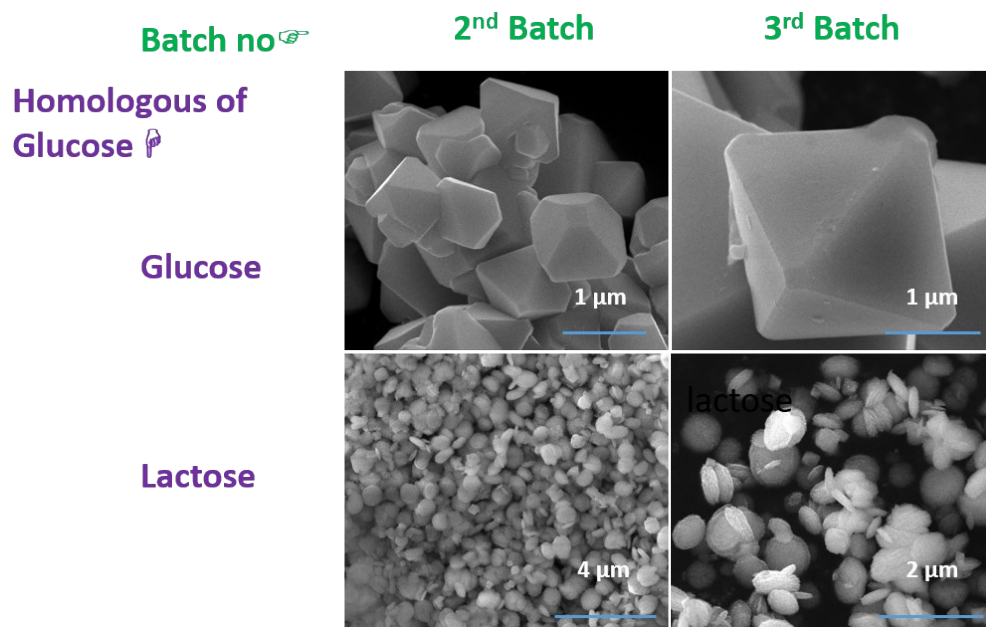

**Figure S5.** SEM micrographs of  $\text{Cu}_2\text{O}$  nano crystals: Effect on the morphology after the regeneration of catalyst.

Figure S6

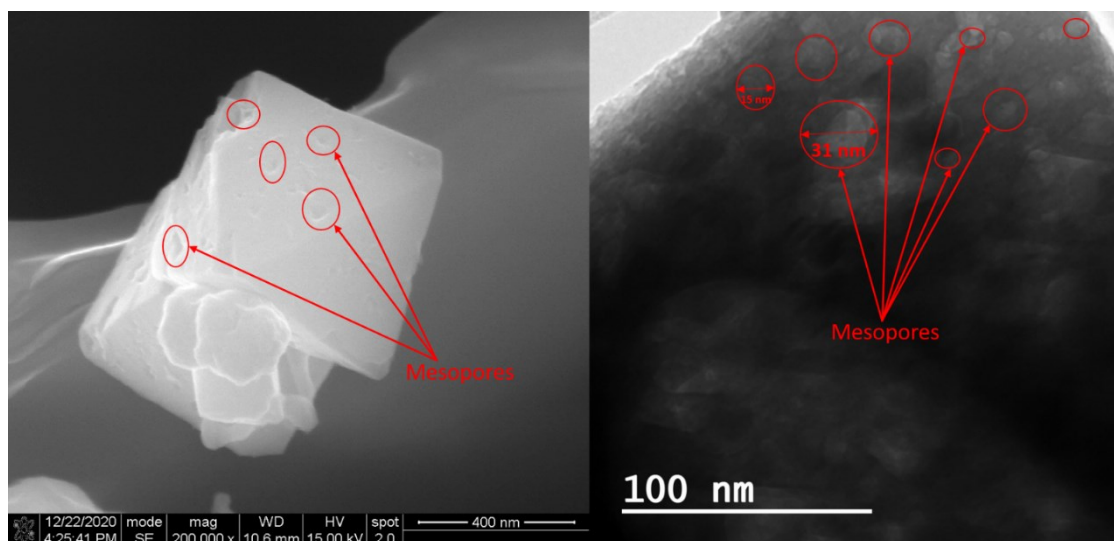

**Figure S6.** SEM and TEM images of  $\text{Cu}_2\text{O}$  mesopores.

Figure S7

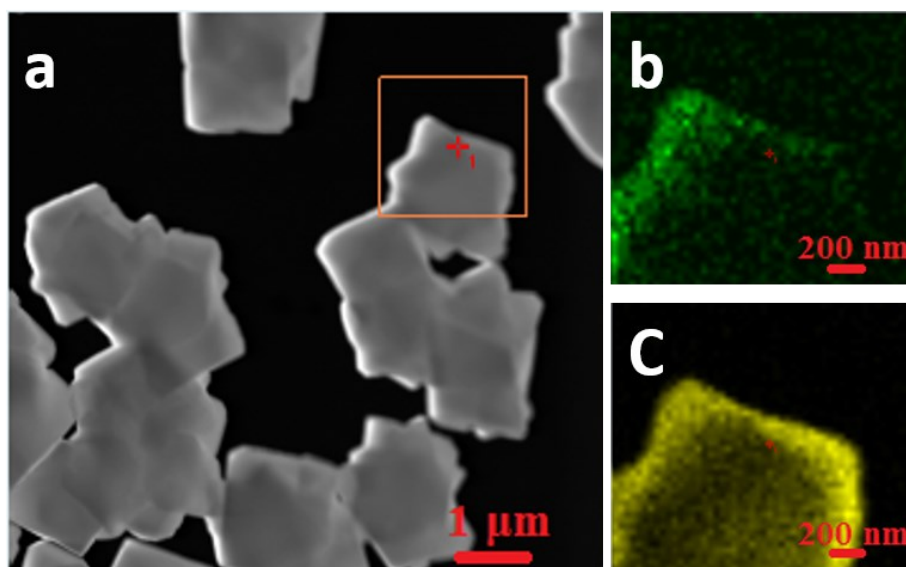

**Figure S7.** Elemental mapping of Cu and O of the corresponding TEM image.

Figure S8.

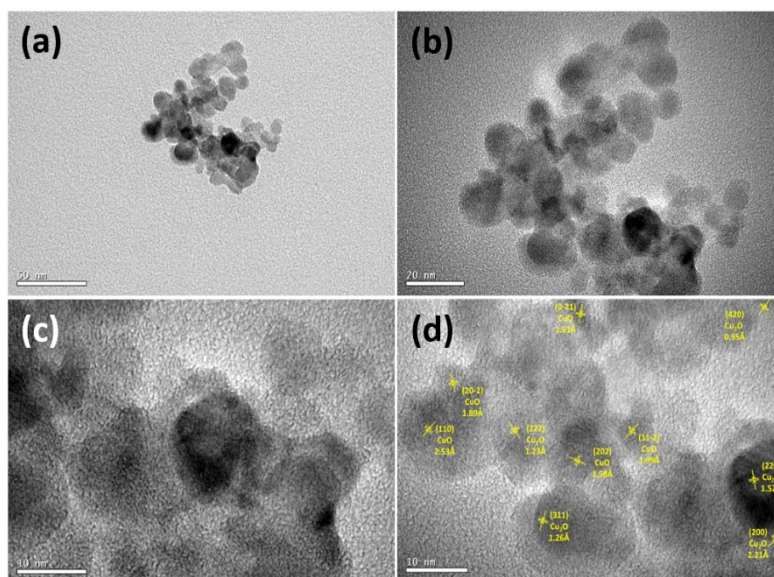

**Figure S8.** TEM images of the spent Cu<sub>2</sub>O nanocrystals.

Figure S9

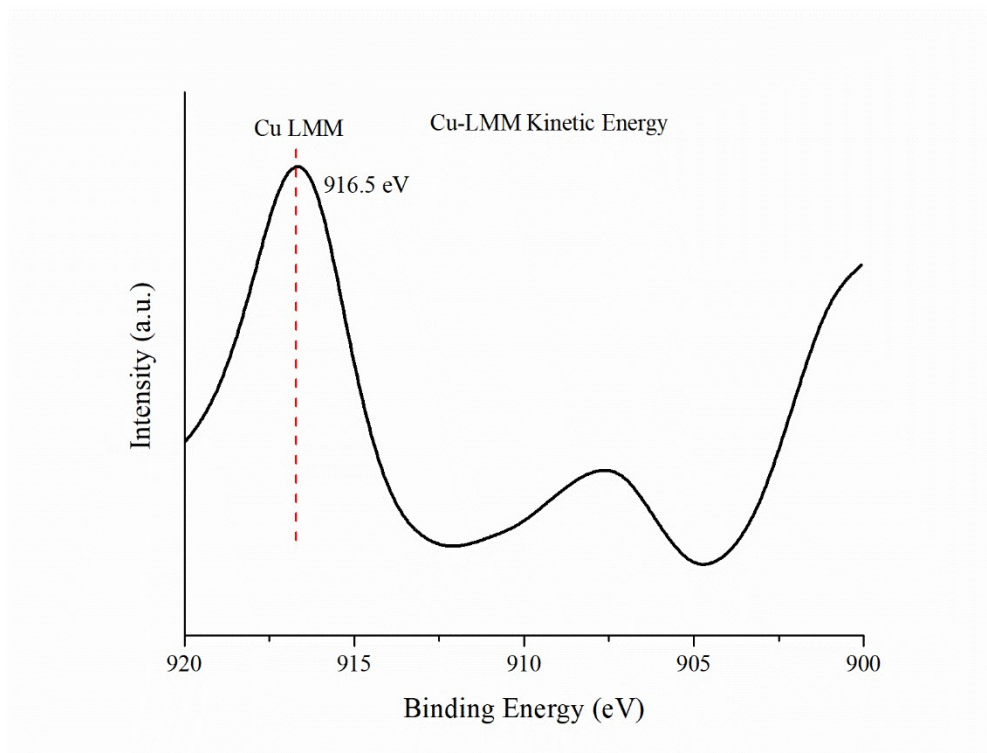

**Figure S9.** XAES (Cu-LMM) spetcrum of Cu<sub>2</sub>O nanocrystals.

Figure S10

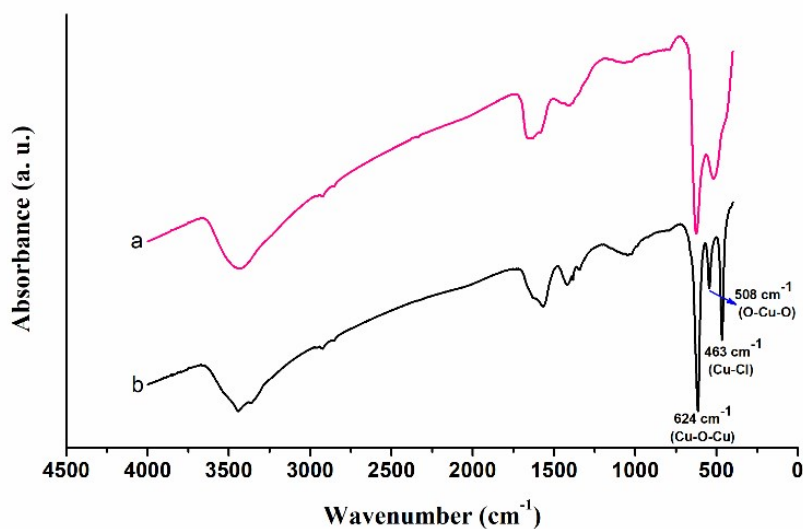

**Figure S10.** FT-IR spectra of Cu<sub>2</sub>O nanocrystals (a) octahedral and (b) collected during the reaction with Cl-benzene.

Figure S11.

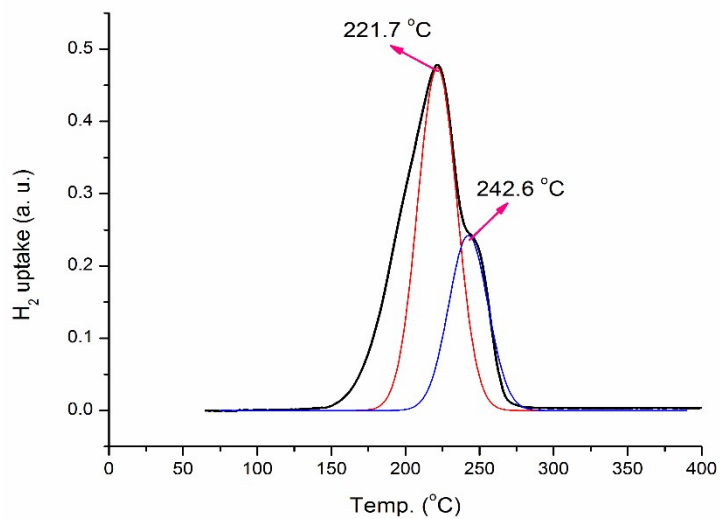

**Figure S11.** TPR pattern of the Cu<sub>2</sub>O mesocage prepared via pulse mode sonication of copper(II) acetate.

Figure S12

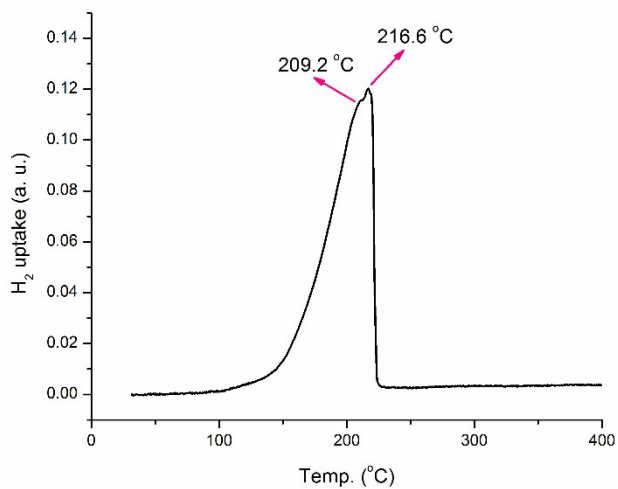

**Figure S12.** TPR of porous Cu<sub>2</sub>O prepared via pulse mode sonication of copper(II) acetate.

Figure S13

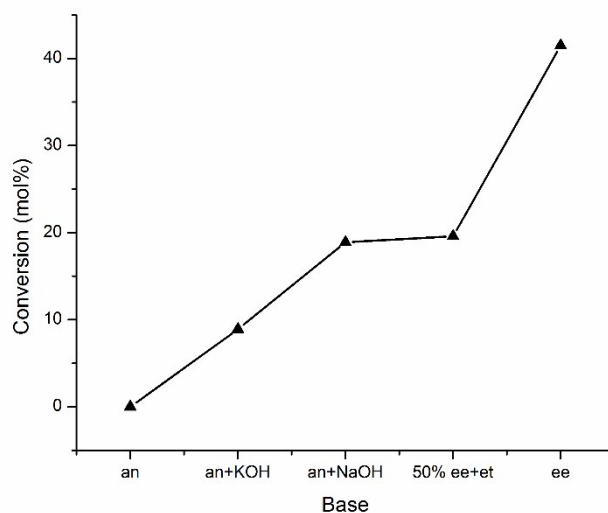

**Figure S13.** Effect of solvent polarity on the homocoupling of Iodobenzene. (where an= acetonitrile, ee=2-(Ethylamino)ethanol)

Figure S14

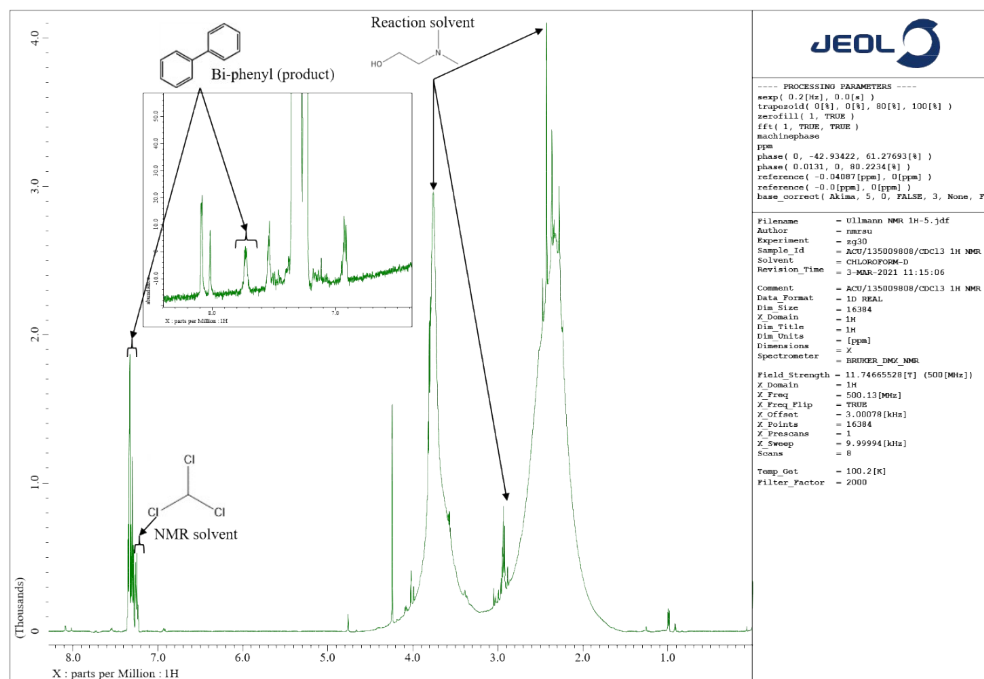

**Figure S14.**  $^1\text{H}$  NMR of the representative products obtained from the homocoupling of chlorobenzene.

Figure S15

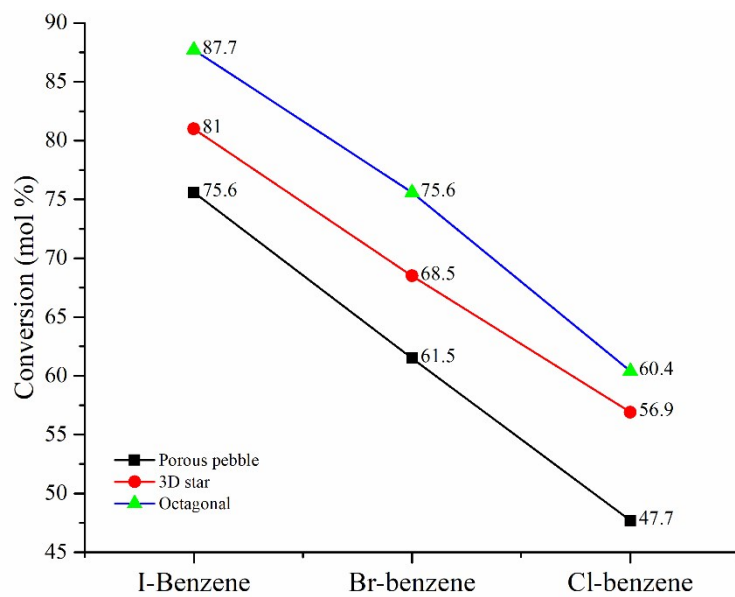

**Figure S15.** Effect of morphology on the conversion of Ar-X (X= Cl, Br, I)
